# Supplementary material for: Siloxane tethered perylene diimide: from monotropic phase structures to tunable photoconductivity
Source: Royal Society of Chemistry journal article supplement (doi:10.1039/d1tc00822f), 2021-01-01
Supplement: d1tc00822f1.pdf [file d1tc00822f1.pdf]

## **Supporting Information**

# **Siloxane Tethered Perylene Diimide: from Monotropic Phase Structures to Tunable Photoconductivity**

Dan Zhang, ‡<sup>a</sup> Jie Liu, ‡<sup>a</sup> Si-Yu Gao, <sup>a</sup> Maxim V. Bermeshev, <sup>b</sup> Zhijian Chen<sup>a</sup> and Xiang-Kui Ren<sup>\*,a,c</sup>

<sup>a</sup> School of Chemical Engineering and Technology, State Key Laboratory of Chemical Engineering, Tianjin University, Tianjin 300350, P. R. China

<sup>b</sup> A. V. Topchiev Institute of Petrochemical Synthesis of Russian Academy of Sciences, Moscow, 119991, Russia.

<sup>c</sup> Guangdong Provincial Key Laboratory of Functional and Intelligent Hybrid Materials and Devices, South China University of Technology, Guangzhou, 510640, P. R. China.

**\*Corresponding Author.**

E-mail address: renxiangkui@tju.edu.cn.

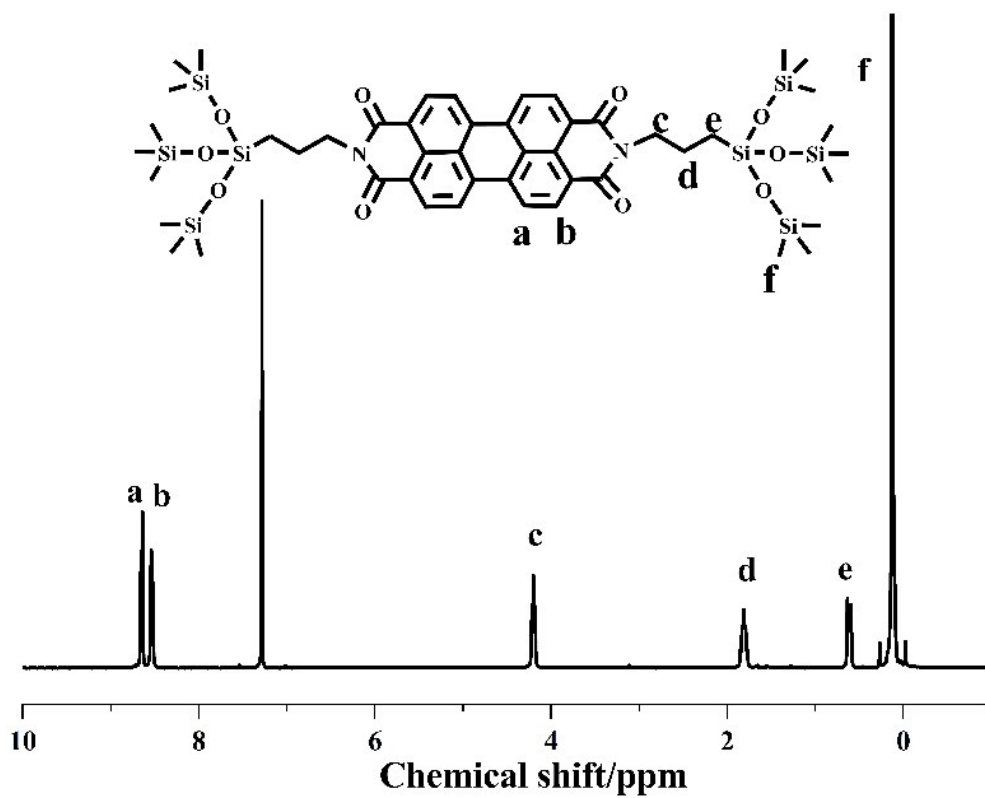

Fig. S1 <sup>1</sup>H NMR of PDI-TTMSS in CDCl<sub>3</sub>.

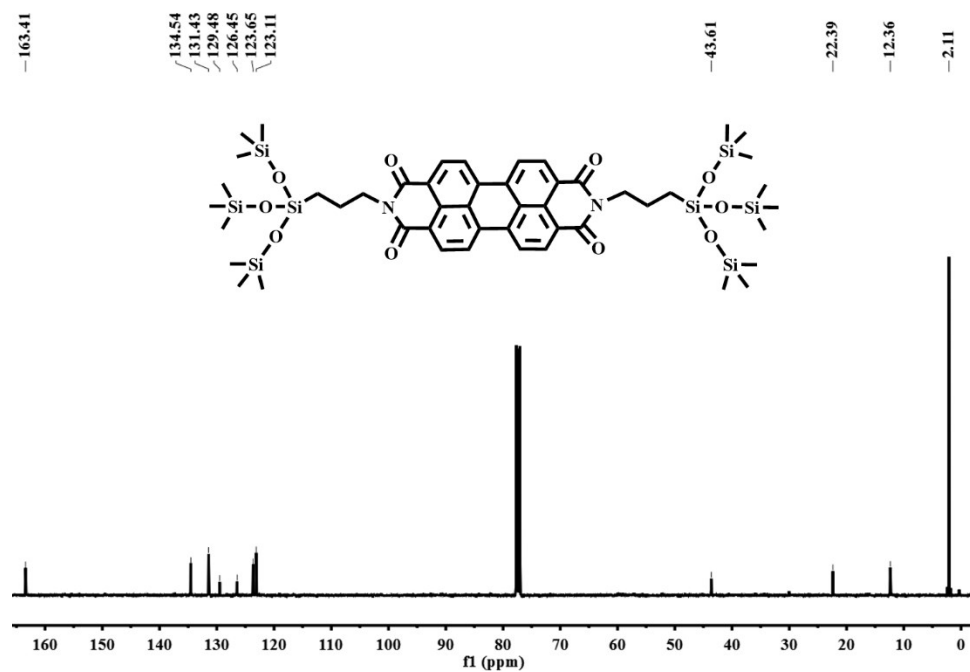

Fig. S2 <sup>13</sup>C NMR of PDI-TTMSS in CDCl<sub>3</sub>.

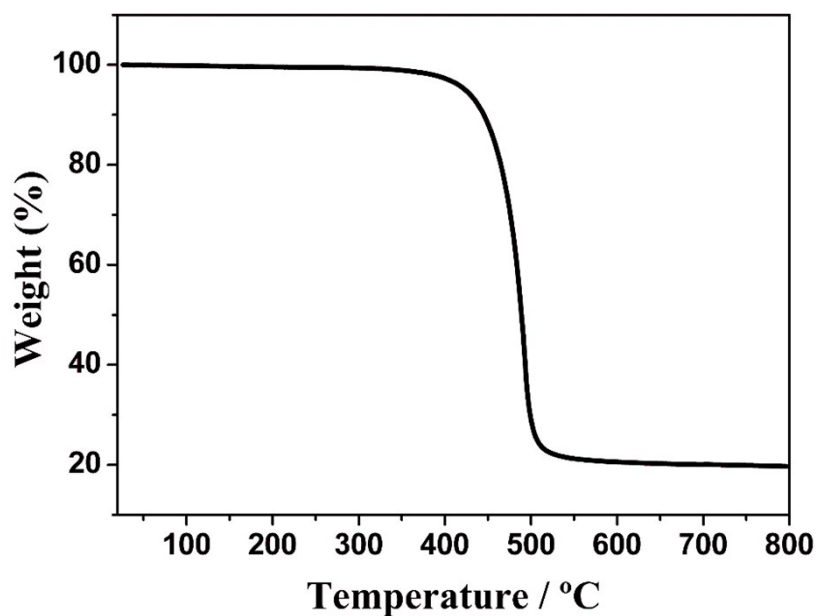

Fig. S3 The TGA curve of PDI-TTMSS.

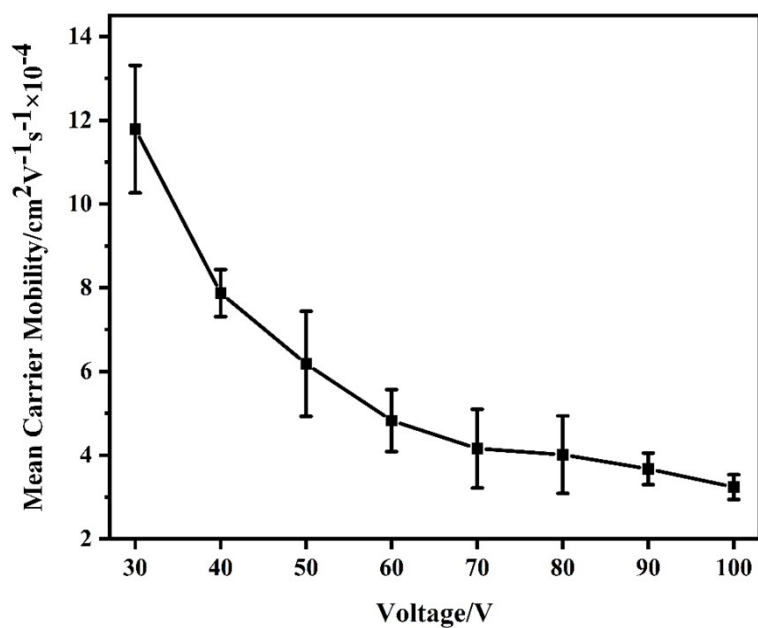

Fig. S4 Mean and standard deviation of carrier mobility at different voltages.

Table 1. Standard deviation of carrier mobility at different voltages.

| Voltage/V                             | 30   | 40   | 50   | 60   | 70   | 80   | 90   | 100  |
|---------------------------------------|------|------|------|------|------|------|------|------|
| Standard deviation × 10 <sup>-4</sup> | 1.52 | 0.56 | 1.25 | 0.74 | 0.94 | 0.93 | 0.38 | 0.30 |
